# Supplementary material for: Micronutrient Profile and Carbohydrate Microstructure of Commercially Prepared and Home Prepared Infant Fruit and Vegetable Purees
Source: MDPI journal article supplement (doi:10.3390/nu15010045), 2022-12-22
Supplement: s1 [file s1]

---

## Supplementary Materials

**Table S1.** Description of commercially prepared purees included in the chemical nutritional analyses.

| <b>Fruit or Vegetable</b> | <b>Country</b> | <b>Description</b>                                  |
|---------------------------|----------------|-----------------------------------------------------|
| Apples                    | BR             | Nestle 1 <sup>st</sup> Foods Apple Puree            |
| Apples                    | CN             | Gerber 2 <sup>nd</sup> Foods Apple Puree            |
| Apples                    | FI             | Piltti 1 <sup>st</sup> Foods Apple Puree            |
| Apples                    | FR             | NaturNes 1 <sup>st</sup> Foods Apple Puree          |
| Apples                    | MX             | Gerber 1 <sup>st</sup> Foods Apple Puree            |
| Apples                    | PL             | Gerber 1 <sup>st</sup> Foods Apple Puree            |
| Apples                    | US             | Gerber 1 <sup>st</sup> Foods Apple Puree            |
| Apples                    | US             | Gerber 2 <sup>nd</sup> Foods Apple Puree            |
| Bananas                   | MX             | Gerber 1 <sup>st</sup> Foods Banana Puree           |
| Bananas                   | PL             | Gerber 1 <sup>st</sup> Foods Banana Puree           |
| Bananas                   | US             | Gerber 1 <sup>st</sup> Foods Banana Puree           |
| Bananas                   | US             | Gerber 2 <sup>nd</sup> Foods Banana Puree           |
| Bananas                   | US             | Gerber 2 <sup>nd</sup> Foods Banana Pouch           |
| Butternut Squash          | US             | Gerber 1 <sup>st</sup> Foods Butternut Squash Puree |
| Butternut Squash          | US             | Gerber 2 <sup>nd</sup> Foods Butternut Squash Puree |
| Carrots                   | MX             | Gerber 1 <sup>st</sup> Foods Carrot Puree           |
| Carrots                   | PL             | Gerber 1 <sup>st</sup> Foods Carrot Puree           |
| Carrots                   | US             | Gerber 2 <sup>nd</sup> Foods Carrot Puree           |
| Green Beans               | US             | Gerber 1 <sup>st</sup> Foods Green Beans            |
| Green Beans               | US             | Gerber 2 <sup>nd</sup> Foods Green Beans            |
| Green Peas                | US             | Gerber 1 <sup>st</sup> Foods Pea Puree              |
| Green Peas                | US             | Gerber 2 <sup>nd</sup> Foods Pea Puree              |
| Mangoes                   | FI             | Piltti 1 <sup>st</sup> Foods Mango Puree            |
| Mangoes                   | PL             | Gerber 1 <sup>st</sup> Foods Mango Puree            |
| Mangoes                   | US             | Gerber 2 <sup>nd</sup> Foods Mango Puree            |
| Peaches                   | PL             | Nestle 1 <sup>st</sup> Foods Peach Puree            |
| Peaches                   | US             | Gerber 2 <sup>nd</sup> Foods Peach Puree            |
| Pears                     | CN             | Gerber 2 <sup>nd</sup> Foods Pear Puree             |
| Pears                     | MX             | Gerber 2 <sup>nd</sup> Foods Pear Puree             |
| Pears                     | PL             | Gerber 1 <sup>st</sup> Foods Pear Puree             |
| Pears                     | US             | Gerber 1 <sup>st</sup> Foods Pear Puree             |
| Pears                     | US             | Gerber 2 <sup>nd</sup> Foods Pear Puree             |
| Sweet Potatoes            | US             | Gerber 1 <sup>st</sup> Foods Sweet Potato Puree     |
| Sweet Potatoes            | US             | Gerber 2 <sup>nd</sup> Foods Sweet Potato Puree     |

**Table S2.** Food profiles derived from the external food nutrient databases.

|                  | <b>Database</b> | <b>Description</b>                                                             |
|------------------|-----------------|--------------------------------------------------------------------------------|
| Apples           | USDA            | Apple, raw (FDC ID: 786631)                                                    |
|                  | USDA            | Apples, raw, without skin (FDC ID: 171689)                                     |
|                  | USDA            | Apples, raw, without skin, cooked (FDC ID: 173928)                             |
|                  | Ciqua           | Apple, pulp, roasted/baked                                                     |
|                  | Ciqua           | Apple, pulp, raw                                                               |
|                  | SFK             | Apple                                                                          |
| Bananas          | USDA            | Bananas, raw FDC ID: 173944                                                    |
|                  | Ciqua           | Banana, pulp, raw                                                              |
|                  | SFK             | Banana                                                                         |
| Butternut Squash | USDA            | Squash, winter, butternut, raw FDC ID: 169295                                  |
|                  | USDA            | Squash, winter, butternut, frozen, unprepared FDC ID: 168473                   |
|                  | USDA            | Squash, winter, butternut. Cooked, baked, w/o salt FDC ID: 169296              |
|                  | USDA            | Squash, winter, butternut, frozen, cooked, boiled, without salt FDC ID: 168474 |
|                  | USDA            | Butternut Squash FDC ID: 604530                                                |
|                  | Ciqua           | Squash, butternut, pulp, raw                                                   |
|                  | Ciqua           | Squash, butternut, peeled, cooked                                              |
|                  | SFK             | squash, winter                                                                 |
| Carrots          | USDA            | Carrots, raw (FDC ID: 170393)                                                  |
|                  | USDA            | Carrots, cooked, boiled, drained w/o salt (FDC ID: 170394)                     |
|                  | Ciqua           | Carrots, raw                                                                   |
|                  | Ciqua           | Carrot, cooked                                                                 |
|                  | Ciqua           | Carrot, steamed                                                                |
|                  | Ciqua           | Carrot, puree                                                                  |
|                  | SFK             | Carrot                                                                         |
|                  | SFK             | Carrots, boiled, drained                                                       |
|                  | SFK             | Carrots, canned                                                                |
| Green Beans      | USDA            | Beans, String, green, raw FDC ID: 787776                                       |
|                  | Ciqua           | French bean, raw                                                               |
|                  | Ciqua           | French bean, cooked                                                            |
|                  | Ciqua           | French bean, canned, drained                                                   |
|                  | Ciqua           | French bean, boiled/ cooked in water                                           |
|                  | Ciqua           | French bean, frozen, cooked                                                    |
|                  | SFK             | French beans (string beans, haricot beans)                                     |
|                  | SFK             | French beans, canned                                                           |
| Green Peas       | USDA            | Peas, green, raw FDC ID: 170419                                                |
|                  | USDA            | Green peas FDC ID: 447588                                                      |
|                  | USDA            | peas, green, cooked, boiled, drained, without salt FDC ID: 170240              |
|                  | USDA            | Peas, green, canned, no salt added, drained solids FDC ID: 170104              |
|                  | USDA            | Peas, green, frozen, cooked, boiled, drained, without salt FDC ID: 170017      |
|                  | Ciqua           | Garden peas, raw                                                               |
|                  | Ciqua           | Garden peas, frozen, raw                                                       |
|                  | Ciqua           | Garden peas, cooked                                                            |

|                |       |                                                                 |
|----------------|-------|-----------------------------------------------------------------|
|                | Ciqua | Garden peas, canned, drained                                    |
|                | Ciqua | Garden peas, frozen, cooked                                     |
|                | Ciqua | Garden peas, boiled/cooked in water                             |
|                | SFK   | peas seeds, green canned                                        |
|                | SFK   | peas seeds, green boiled, drained                               |
|                | SFK   | Peas seeds, green canned, drained                               |
| Mangoes        | USDA  | Mango, raw FDC: 169910                                          |
|                | USDA  | Mango, raw FDC ID: 786699                                       |
|                | USDA  | Mango, cooked FDC ID: 786701                                    |
|                | Ciqua | Mango, pulp, raw                                                |
|                | SFK   | Mango                                                           |
| Peaches        | USDA  | Peaches, yellow, raw FDC ID: 325430                             |
|                | USDA  | Peach, raw FDC ID: 786708                                       |
|                | USDA  | Peach, cooked or canned, drained solids FDC ID: 786713          |
|                | USDA  | Peach, cooked or canned, unsweetened, water pack FDC ID: 786710 |
|                | Ciqua | Peach, yellow-flesh variety, pulp, raw                          |
|                | Ciqua | Peach, canned in light syrup, drained                           |
|                | Ciqua | Peach, canned in light, not drained                             |
|                | SFK   | Peach                                                           |
|                | SFK   | Peaches, canned                                                 |
| Pears          | USDA  | Pears, raw, bartlett FDC ID: 746773                             |
|                | USDA  | Pear, raw FDC ID: 786720                                        |
|                | USDA  | Pear, raw FDC: 169118                                           |
|                | Ciqua | Pear, pulp and peel, raw                                        |
|                | Ciqua | Pear, peeled, raw                                               |
|                | Ciqua | Pear, canned in light syrup, not drained                        |
|                | Ciqua | Pear, canned in light syrup, drained                            |
|                | SFK   | Pear                                                            |
|                | SFK   | Pears, canned                                                   |
| Sweet Potatoes | USDA  | Sweet potato, NFS (FDC ID: 1103233)                             |
|                | USDA  | Sweet potato, canned, mashed (FDC ID: 169305)                   |
|                | USDA  | Sweet potato, boiled, cooked, w/o skin (FDC ID: 168484)         |
|                | USDA  | Sweet potato, boiled, fat not added in cooking (FDC ID: 787654) |
|                | Ciqua | Sweet potato, raw                                               |
|                | Ciqua | Sweet potato, cooked                                            |
|                | Ciqua | Sweet potato, pulp, steamed                                     |
|                | SFK   | Sweet potato                                                    |

**Table S3.** B vitamin comparison of the food profiles (per 100g) of external food composition databases and the nutritional profiles of chemically analyzed commercially prepared fruit purees for infants (6-12 months). Values are mean (minimum, maximum).

|                               | Apple                   |                                 | Banana                  |                                 | Mango                   |                                 | Peach                   |                                 | Pear                    |                                 |
|-------------------------------|-------------------------|---------------------------------|-------------------------|---------------------------------|-------------------------|---------------------------------|-------------------------|---------------------------------|-------------------------|---------------------------------|
|                               | Home<br>Prepared<br>n=5 | Commercially<br>Prepared<br>n=8 | Home<br>Prepared<br>n=3 | Commercially<br>Prepared<br>n=5 | Home<br>Prepared<br>n=5 | Commercially<br>Prepared<br>n=3 | Home<br>Prepared<br>n=9 | Commercially<br>Prepared<br>n=2 | Home<br>Prepared<br>n=9 | Commercially<br>Prepared<br>n=5 |
| <i>B Vitamins</i>             |                         |                                 |                         |                                 |                         |                                 |                         |                                 |                         |                                 |
| Pantothenic acid<br>(mg/100g) | 0.1 (0.0, 0.2)          | 0.1 (0.0, 0.1)                  | 0.3 (0.2, 0.3)          | 0.1 (0.1, 0.1)                  | 0.2 (0.2, 0.2)          | 0.0 (0.0, 0.0)                  | 0.1 (0.1, 0.2)          | 0.1 (0.1, 0.1)                  | 0.1 (0.0, 0.1)          | 0.0 (0.0, 0.0)                  |
| Folate (mcg/100g)             | 2.7 (0.0, 9.6)          | 2.5 (2.2, 3.0)                  | 19.5 (19.0,<br>20.0)    | 15.1 (14.2, 16)                 | 44.6 (22.0,<br>70.2)    | 5.6 (3.7, 7.4)                  | 7.3 (3.0, 12.0)         | 3.2 (3.2, 3.2)                  | 5.6 (1.0, 11.5)         | 6.5 (4.7, 8.2)                  |
| Thiamin (mg/100g)             | 0.0 (0.0, 0.0)          | 0.1 (0.0, 0.2)                  | 0.0 (0.0, 0.1)          | 0.1 (0.0, 0.2)                  | 0.0 (0.0, 0.1)          | 0.1 (0.0, 0.1)                  | 0.0 (0.0, 0.0)          | 0.1 (0.0, 0.1)                  | 0.0 (0.0, 0.2)          | 0.1 (0.0, 0.2)                  |
| Riboflavin (mcg/100g)         | 25.2 (12.0,<br>32.0)    | 55.0 (27.5,<br>137.5)           | 43.3 (0.0, 73.0)        | 96.0 (36.7,<br>140.0)           | 32.0 (0.0, 50.0)        | 54.3 (27.4,<br>107.7)           | 19.3 (0.0, 51.0)        | 57.7 (23.5,<br>92.0)            | 23.0 (0.0, 38.0)        | 87.0 (29.2,<br>132.7)           |
| Niacin (mg/100g)              | 0.1 (0.1, 0.1)          | 0.3 (0.1, 0.7)                  | 0.5 (0.4, 0.7)          | 0.7 (0.6, 0.7)                  | 0.7 (0.6, 0.7)          | 0.5 (0.5, 0.6)                  | 0.6 (0.3, 0.8)          | 0.7 (0.4, 1.0)                  | 0.2 (0.0, 0.2)          | 0.9 (0.2, 2.6)                  |
| Vitamin B6 (mcg/100g)         | 44.7 (6.0,<br>103.0)    | 46.0 (33.8,<br>68.7)            | 303.3 (180.0,<br>367.0) | 149.0 (66.4,<br>273.3)          | 111.3 (100.0,<br>119.0) | 48.2 (38.0,<br>53.9)            | 15.7 (0.0, 26.0)        | 34.7 (23.5,<br>46.0)            | 19.6 (10.0,<br>29.0)    | 44.9 (29.2,<br>66.4)            |

**Table S4.** B vitamin comparison of the food profiles (per 100g) of external food composition databases and the nutritional profiles of chemically analyzed commercially prepared vegetable purees for infants (6-12 months). Values are mean (minimum, maximum).

|                            | Butternut Squash        |                                 | Carrots                 |                                 | Green Bean              |                                 | Green Peas              |                                 | Sweet Potato            |                                 |
|----------------------------|-------------------------|---------------------------------|-------------------------|---------------------------------|-------------------------|---------------------------------|-------------------------|---------------------------------|-------------------------|---------------------------------|
|                            | Home<br>Prepared<br>n=5 | Commercially<br>Prepared<br>n=8 | Home<br>Prepared<br>n=3 | Commercially<br>Prepared<br>n=5 | Home<br>Prepared<br>n=5 | Commercially<br>Prepared<br>n=3 | Home<br>Prepared<br>n=9 | Commercially<br>Prepared<br>n=2 | Home<br>Prepared<br>n=9 | Commercially<br>Prepared<br>n=5 |
| <i>B Vitamins</i>          |                         |                                 |                         |                                 |                         |                                 |                         |                                 |                         |                                 |
| Pantothenic acid (mg/100g) | 0.0 (0.2, 0.4)          | 0.0 (0.0, 0.0)                  | 0.2 (0.1, 0.3)          | 0.1 (0.1, 0.2)                  | 0.2 (0.1, 0.5)          | 0.0 (0.0, 0.0)                  | 0.2 (0.1, 0.4)          | 0.0 (0.0, 0.0)                  | 0.7 (0.5, 0.8)          | 0.0 (0.0, 0.0)                  |
| Folate (mcg/100g)          | 6.5 (16.0, 27.0)        | 0.0 (0.0, 0.0)                  | 25.2 (14.0, 59.4)       | 3.0 (2.9, 3.1)                  | 34.6 (20.5, 49.5)       | 0.0 (0.0, 0.0)                  | 55.2 (26.5, 87.0)       | 0.0 (0.0, 0.0)                  | 19.7 (6.0, 92.2)        | 0.0 (0.0, 0.0)                  |
| Thiamin (mg/100g)          | 0.1 (0.1, 0.1)          | 0.3 (0.2, 0.3)                  | 0.1 (0.0, 0.1)          | 0.1 (0.0, 0.2)                  | 0.1 (0.0, 0.1)          | 0.2 (0.2, 0.2)                  | 0.2 (0.1, 0.3)          | 0.3 (0.2, 0.3)                  | 0.1 (0.0, 0.1)          | 0.3 (0.2, 0.3)                  |
| Riboflavin (mcg/100g)      | 87.0 (17.0, 60.0)       | 197.2 (172.3, 222.0)            | 26.7 (5.0, 58.0)        | 66.0 (33.8, 128.5)              | 78.3 (38.0, 111.0)      | 137.7 (118.3, 157.0)            | 90.7 (0.1, 160.0)       | 202.8 (172.9, 232.7)            | 38.2 (0.1, 90.0)        | 219.0 (182.3, 255.7)            |
| Niacin (mg/100g)           | 0.9 (0.5, 1.2)          | 0.9 (0.8, 1.1)                  | 0.4 (0.1, 1.0)          | 0.4 (0.2, 0.6)                  | 0.4 (0.2, 0.7)          | 0.7 (0.6, 0.8)                  | 1.4 (0.4, 2.2)          | 1.9 (1.7, 2.1)                  | 0.7 (0.5, 1.0)          | 1.1 (0.9, 1.2)                  |
| Vitamin B6 (mcg/100g)      | 44.9 (69.0, 154.0)      | 98.6 (86.2, 111.0)              | 97.8 (1.5, 270.0)       | 44.5 (33.8, 64.2)               | 84.5 (0.1, 264.0)       | 68.8 (59.2, 78.5)               | 93.2 (0.1, 216.0)       | 101.4 (86.4, 116.3)             | 126.1 (0.2, 235.0)      | 109.5 (91.1, 127.8)             |

**Figure S1.** High-performance anion exchange chromatograms of free sugars in water extracts from purees.

Chromatogram 1. DP (Dionex HPAEC) profile carrot puree commercially prepared versus home prepared

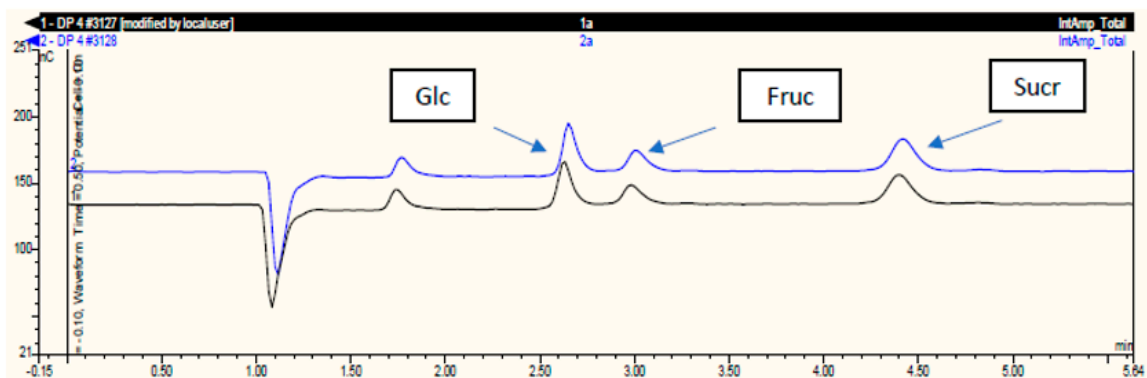

Chromatogram 2. DP (Dionex HPAEC) profile apple puree commercially prepared versus home prepared

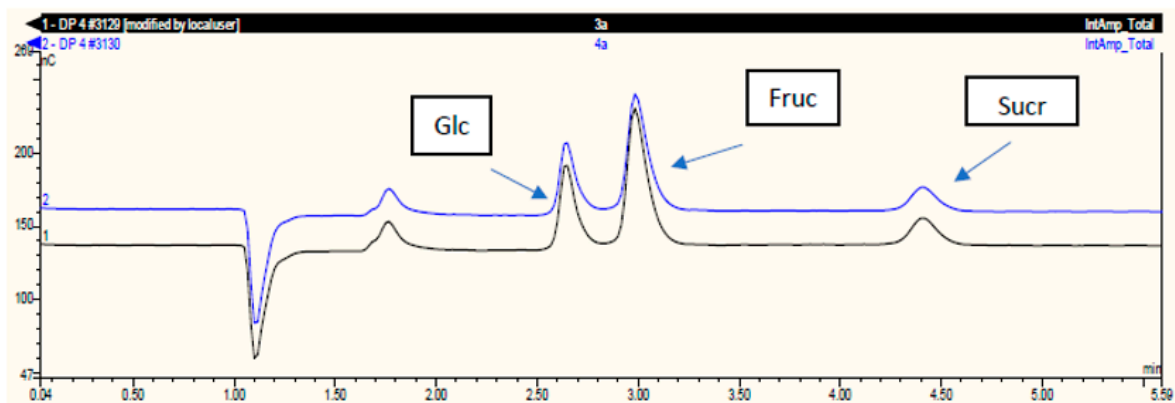

Chromatogram 3. DP (Dionex HPAEC) profile green pea puree commercially prepared versus home prepared

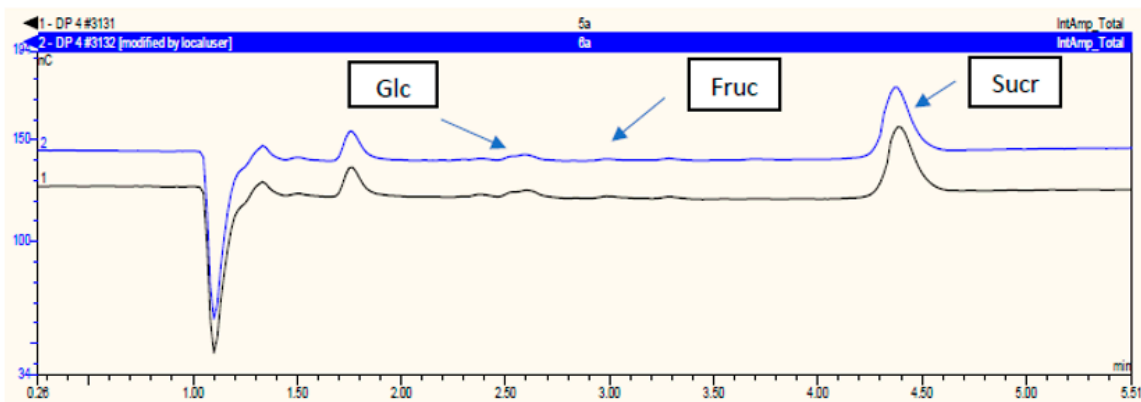

**Table S5.** Molecular weights (kDa) of cell wall polysaccharides from the soluble and insoluble fractions of purees.

| <b>Purée</b>                      | <b>Peak 1</b> | <b>Peak 2</b> | <b>Peak 3</b> | <b>Peak 4</b> | <b>Peak 5</b> |
|-----------------------------------|---------------|---------------|---------------|---------------|---------------|
| <i><b>Soluble fractions</b></i>   |               |               |               |               |               |
| Commercially prepared apple       | ND            | ND            | 320 ± 16      | 170 ± 8.7     | LMW           |
| Home prepared apple               | ND            | ND            | 330 ± 5.7     | 160 ± 8.1     | LMW           |
| Commercially prepared carrot      | 3100 ± 110    | 1100 ± 56     | 3200 ± 17     | 2000 ± 27     | LMW           |
| Home prepared carrot              | 3100 ± 110    | 1100 ± 19     | 3000 ± 10     | 2000 ± 11     | LMW           |
| Commercially prepared green pea   | 6700 ± 230    | 1100 ± 19     | 340 ± 24      | 210 ± 11      | LMW           |
| Home prepared green pea           | 4800 ± 160    | 9600 ± 33     | 320 ± 5.4     | 210 ± 3.7     | LMW           |
| <i><b>Insoluble fractions</b></i> |               |               |               |               |               |
| Commercially prepared apple       | ND            | 300 ± 21      | 9.7 ± 0.17    | LMW           | LMW           |
| Home prepared apple               | ND            | 300 ± 20      | 10 ± 0.71     | LMW           | LMW           |
| Commercially prepared carrot      | 190 ± 6.6     | 53 ± 0.9      | 6.6 ± 0.11    | LMW           | LMW           |
| Home prepared carrot              | 210 ± 3.6     | 51 ± 0.88     | 6.2 ± 0.0     | LMW           | LMW           |
| Commercially prepared green pea   | ND            | ND            | 1400 ± 49     | LMW           | LMW           |
| Home prepared green pea           | ND            | ND            | 1800 ± 92     | LMW           | LMW           |

ND: Not Determined; LMW: Low Molecular Weight.
